# THE AMERICAN JOURNAL OF PSYCHIATRY

---

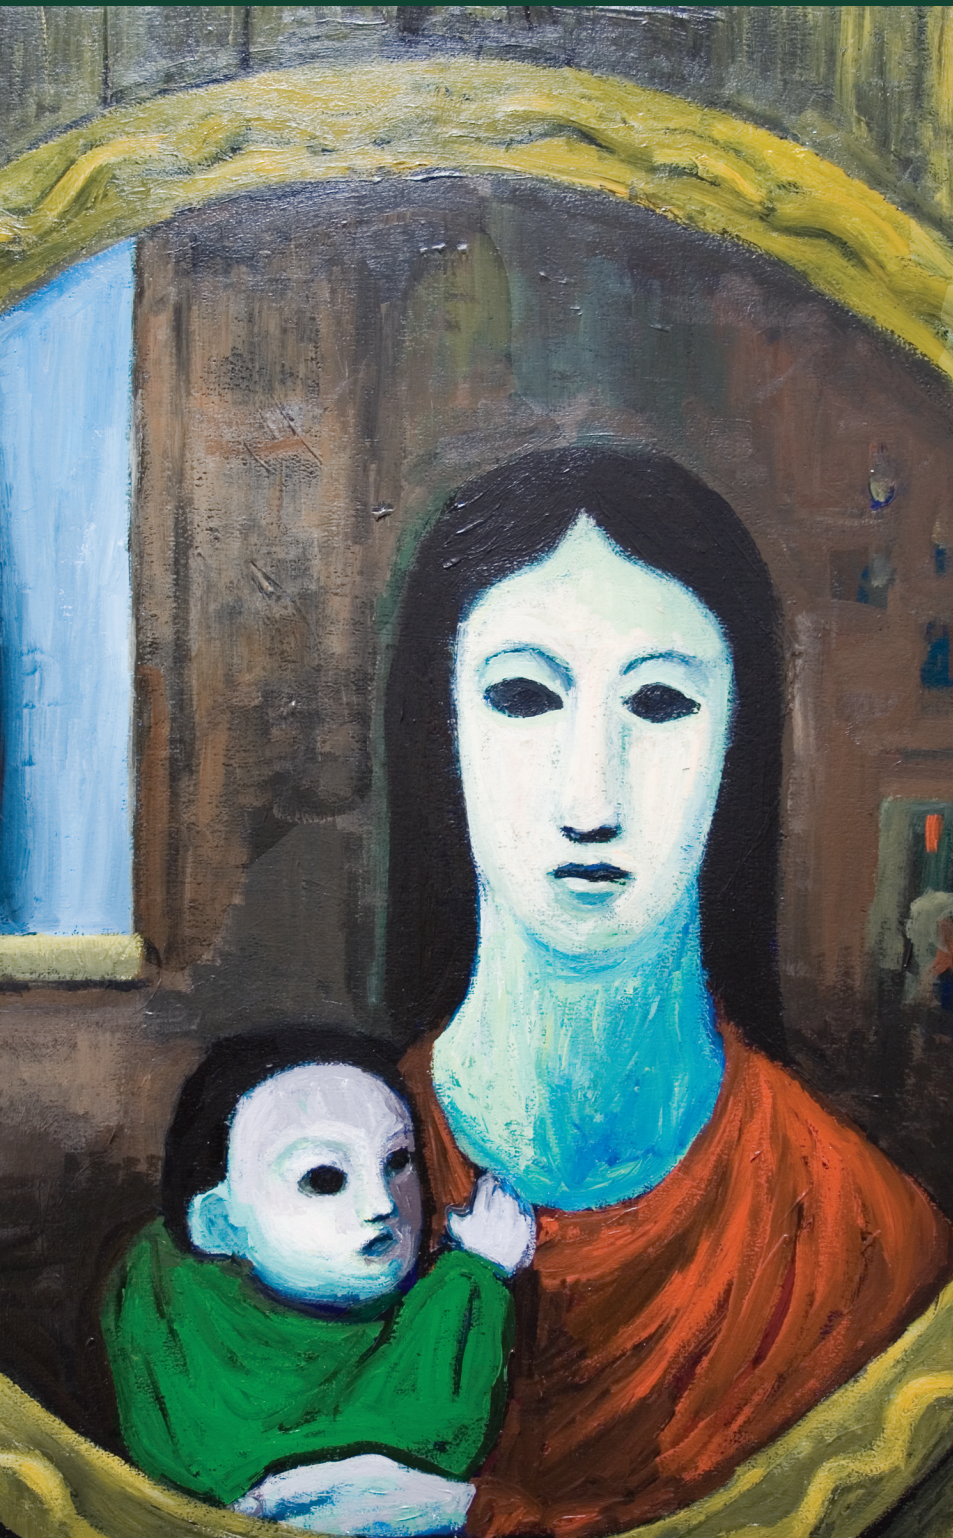

## A Sea Change in the Treatment of Alcoholism

Joe Westermeyer, M.D. 1093

## Phenotype Matters: The Case for Careful Characterization of Relevant Traits

Linda M. Brzustowicz, M.D.  
and Anne S. Bassett, M.D. 1096

◀ **Children of Depressed Mothers  
1 Year After the Initiation of  
Maternal Treatment: Findings  
From the STAR\*D-Child Study**  
Daniel Pilowsky, M.D., M.P.H., et al. 1136

◀ **Brief Interpersonal  
Psychotherapy for Depressed  
Mothers Whose Children Are  
Receiving Psychiatric Treatment**  
Holly A. Swartz, M.D., et al. 1155

Continuing Medical Education 1223

September 2008

Volume 165 • Number 9

---

Official Journal of the  
AMERICAN PSYCHIATRIC ASSOCIATION

---

[ajp.psychiatryonline.org](http://ajp.psychiatryonline.org)
