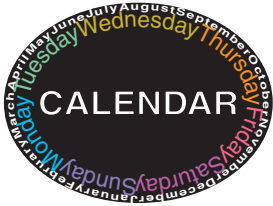

Continued from page A24

20016-3007; (202) 966-7300 (tel), (202) 966-2891 (fax), meetings@aacap.org (e-mail), www.aacap.org (web site).

## MAY 2010

May 22–27, 163rd Annual Meeting of the American Psychiatric Association, New Orleans, LA. Contact: Cathy Nash, APA Annual Meetings Dept., 1000 Wilson Blvd., Ste. 1825, Arlington, VA 22209; (703) 907-7822.

## OCTOBER

Oct 14–17, 57th Annual Meeting of the American Academy of Child and Adolescent Psychiatry, Boston, MA. Contact: AACAP, 3615 Wisconsin Avenue, N.W., Washington, DC 20016-3007; (202) 966-7300 (tel), (202) 966-2891 (fax), meetings@aacap.org (e-mail), www.aacap.org (web site).

### Continuing Medical Education

Three articles in each issue provide an opportunity to earn up to 1 hour category 1 CME credit each by taking a course covering the content. Credit available online only with purchased subscription to AJP's CME program. Visit [cme.psychiatryonline.org](http://cme.psychiatryonline.org) for details.

### FREE AUDIO! Have You Heard?

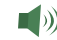

You can listen to highlights of *The American Journal of Psychiatry* by downloading a monthly free .mp3 audio file from our website (<http://ajp.psychiatryonline.org/misc/audio.dtl>) or by subscribing to the AJP Audio podcast at iTunes or other feed reader.

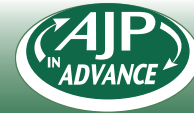

### GET AHEAD!

Subscribers can now view PDFs of all new research articles before print publication by clicking on the "AJP in Advance" logo at the AJP website ([ajp.psychiatryonline.org](http://ajp.psychiatryonline.org)).

## Coming in the October 2008 issue\*

### THE AMERICAN JOURNAL OF PSYCHIATRY

#### *Olanzapine in the Treatment of Low Body Weight and Obsessive Thinking in Women With Anorexia Nervosa: A Randomized, Double-Blind, Placebo-Controlled Trial*

H. Bissada, G.A. Tasca, A.M. Barber, and J. Bradwejn

#### *Compulsive Hoarding: OCD Symptom, Distinct Clinical Syndrome, or Both?*

A. Pertusa, M.A. Fullana, S. Singh, P. Alonso, J.M. Menchón, and D. Mataix-Cols

#### *Gray Matter Structural Alterations in Psychotropic Drug-Naive Pediatric Obsessive-Compulsive Disorder:*

##### *An Optimized Voxel-Based Morphometry Study*

P.R. Szeszko, C. Christian, F. MacMaster, T. Lencz, Y. Mirza, S.P. Taormina, P. Easter, M. Rose, G.A. Michalopoulou, and D.R. Rosenberg

#### *White Matter Abnormalities in Patients With Obsessive-Compulsive Disorder and Their First-Degree Relatives*

L. Menzies, G.B. Williams, S.R. Chamberlain, C. Ooi, N. Fineberg, J. Suckling, B.J. Sahakian, T.W. Robbins, and E.T. Bullmore

\*Can't wait? Visit [ajp.psychiatryonline.org](http://ajp.psychiatryonline.org) and click the "AJP in Advance" logo to see all articles uploaded in advance of print!

## Continuing Medical Education

You now have an opportunity to earn CME credits by reading articles in *The American Journal of Psychiatry*. Three articles in this issue each comprise a short course for up to 1 hour category 1 CME credit each. The course comprises reading the article and answering three multiple-choice questions with a single correct answer. CME credit is issued only online. Readers who want credit must subscribe to the AJP Continuing Medical Education Course Program ([cme.psychiatryonline.org](http://cme.psychiatryonline.org)), select *The American Journal of Psychiatry* at that site, take the course(s) of their choosing, complete the evaluation form, and submit their answers for CME credit. In the online course, correct answers will be highlighted for the reader's reference; there is no minimum threshold score necessary for the credit. A link from the question to the correct answer in context will be highlighted in the associated article. A certificate for each course will be generated upon successful completion.

### Information for Participants

**Objectives:** After evaluating a specific journal article, participants should be able to demonstrate an increase in their knowledge of clinical medicine. Participants should be able to understand the contents of a selected research or review article and to apply the new findings to their clinical practice.

**Participants:** This program is designed for all psychiatrists in clinical practice, residents in Graduate Medical Education programs, medical students interested in psychiatry, and other physicians who wish to advance their current knowledge of clinical medicine.

**Explanation of How Physicians Can Participate and Earn Credit:** In order to earn CME credit, subscribers should read through the material presented in the article. After reading the article, complete the CME quiz online at [cme.psychiatryonline.org](http://cme.psychiatryonline.org) and submit your evaluation and study hours (up to 1 AMA PRA Category 1 Credit™).

**Credits:** The American Psychiatric Association designates this educational activity for a maximum of 1 AMA PRA Category 1 Credit™. Physicians should only claim credit commensurate with the extent of their participation in the activity. The American Psychiatric Association is accredited by the Accreditation Council for Continuing Medical Education (ACCME) to provide continuing medical education (CME) for physicians.

### Information on Courses

**Title:** Body Dysmorphic Disorder: Treating an Underrecognized Disorder

**Faculty:** Katharine A. Phillips, M.D., Elizabeth R. Didie, Ph.D., Jamie Feusner, M.D., Sabine Wilhelm, Ph.D.

**Affiliations:** Butler Hospital and the Warren Alpert Medical School of Brown University, Providence, R.I. (K.A.P., E.R.D.); the Semel Institute for Neuroscience and Human Behavior and the David Geffen School of Medicine at UCLA (J.F.); and Massachusetts General Hospital and Harvard Medical School (S.W.).

**Disclosures:** Dr. Phillips receives research support from NIMH, the FDA, the American Foundation for Suicide Prevention, Forest Laboratories (medication only), and UCB Pharma (investigator-initiated research grant) and has received publication or speaking honoraria from Merck and academic institutions and royalties from Wrightson Biomedical Publishing; she may receive future royalties from Oxford University Press, Guilford Publications, and The Free Press. Dr. Didie receives research support from NIMH. Dr. Feusner receives support from NIMH, the Obsessive-Compulsive Foundation, and the UCLA Academic Senate and received a consultation honorarium from Jazz Pharmaceuticals. Dr. Wilhelm has received research support from NIMH, the FDA, the Obsessive-Compulsive Foundation, the Tourette Syndrome Association, and Forest Laboratories (medication only). Dr. Wilhelm is a presenter for the Massachusetts General Hospital Psychiatry Academy in educational programs supported through independent medical education grants from pharmaceutical companies; she has received royalties from Guilford Publications and New Harbinger Publications and may receive future royalties from Oxford University Press.

**Discussion of unapproved or investigational use of products\*:** Yes

**Title:** Mentalization: Ontogeny, Assessment, and Application in the Treatment of Borderline Personality Disorder

**Faculty:** Lois W. Choi-Kain, M.D., M.Ed., John G. Gunderson, M.D.

**Affiliation:** Department of Psychiatry, Harvard Medical School.

**Disclosures:** The authors report no competing interests.

**Discussion of unapproved or investigational use of products\*:** None

**Title:** An Adoption Study of Parental Depression as an Environmental Liability for Adolescent Depression and Childhood Disruptive Disorders

**Faculty:** Erin C. Tully, Ph.D., William G. Iacono, Ph.D., Matt McGue, Ph.D.

**Affiliations:** Department of Psychology, University of Minnesota.

**Disclosures:** The authors report no competing interests.

**Discussion of unapproved or investigational use of products\*:** None

\* American Psychiatric Association policy requires disclosure by CME authors of unapproved or investigational use of products discussed in CME programs. Off-label use of medications by individual physicians is permitted and common. Decisions about off-label use can be guided by scientific literature and clinical experience.

Exams are available online only at [cme.psychiatryonline.org](http://cme.psychiatryonline.org)

## INFORMATION TO PARTICIPANTS

**OBJECTIVES.** After evaluating a specific journal article published in the American Journal of Psychiatry, participants should be able to demonstrate an increase in their knowledge of clinical medicine. Participants should be able to understand the contents of a selected research or review article and to apply the new findings to their clinical practice.

**PARTICIPANTS.** This program is designed for all psychiatrists in clinical practice, residents in Graduate Medical Education programs, medical students interested in psychiatry, and other physicians who wish to advance their current knowledge of clinical medicine.

**EXPLANATION OF HOW PHYSICIANS CAN PARTICIPATE AND EARN CREDIT.** In order to earn CME credit, subscribers should read through

the material presented in the article. After reading the article, complete the CME quiz online at [cme.psychiatryonline.org](http://cme.psychiatryonline.org) and submit your evaluation and study hours (up to 1 *AMA PRA Category 1 Credit*<sup>TM</sup>).

**CREDITS.** The APA designates this educational activity for a maximum of 1 *AMA PRA Category 1 Credit*<sup>TM</sup>. Physicians should only claim credit commensurate with the extent of their participation in the activity. The American Psychiatric Association (APA) is accredited by the Accreditation Council for Continuing Medical Education (ACCME) to provide continuing medical education (CME) for physicians.

**Estimated Time to Complete: 1 Hour**

Begin date September 1, 2008 – End date August 31, 2010

## EXAMINATION QUESTIONS

Select the single best answer for each question below.

### Body Dysmorphic Disorder: Treating an Underrecognized Disorder

Katharine A. Phillips et al.

Am J Psychiatry 2008; 165:1111-1118

**QUESTION 1.** Available data indicate that which of the following classes of medications is often efficacious for body dysmorphic disorder, including its delusional variant?

- A. Second generation antipsychotics.
- B. First generation antipsychotics.
- C. Serotonin-reuptake inhibitors.
- D. Anticonvulsants.

**QUESTION 2.** Available data indicate that which of the following types of therapy is often efficacious for body dysmorphic disorder?

- A. Supportive therapy.
- B. Cognitive restructuring, exposure, and response prevention.
- C. Psychodynamic psychotherapy.
- D. Relaxation techniques.

**QUESTION 3.** For a patient with body dysmorphic disorder who shows no improvement with a 5-week, well-tolerated trial of citalopram 20 mg/day, clinical experience suggests that the best next step is which of the following?

- A. Increase the citalopram dose and continue the trial.
- B. Discontinue citalopram and switch to an antipsychotic.
- C. Discontinue citalopram and switch to another serotonin reuptake inhibitor.
- D. Continue citalopram at 20 mg/day.

## EVALUATION QUESTIONS

*This evaluation form is adapted from the MedBiquitous Journal-Based Continuing Education Guidelines 28 November 2005. This evaluation will appear online at the end of each CME course. Participants must complete this evaluation in order to receive credit. Select the response which best indicates your reaction to the following statements about this activity.*

**STATEMENT 1.** The activity achieved its stated objectives.

- 1. Strongly agree
- 2. Agree
- 3. Neutral
- 4. Disagree
- 5. Strongly disagree

**STATEMENT 2.** The activity was relevant to my practice.

- 1. Strongly agree
- 2. Agree
- 3. Neutral
- 4. Disagree
- 5. Strongly disagree

**STATEMENT 3.** I plan to change my current practice based on what I learned in the activity.

- 1. Strongly agree
- 2. Agree
- 3. Neutral
- 4. Disagree
- 5. Strongly disagree

**STATEMENT 4.** The activity validated my current practice.

- 1. Strongly agree
- 2. Agree
- 3. Neutral
- 4. Disagree
- 5. Strongly disagree

**STATEMENT 5.** The activity provided sufficient scientific evidence to support the content presented.

- 1. Strongly agree
- 2. Agree
- 3. Neutral
- 4. Disagree
- 5. Strongly disagree

**STATEMENT 6.** The activity was free of commercial bias toward a particular product or company.

- 1. Strongly agree
- 2. Agree
- 3. Neutral
- 4. Disagree
- 5. Strongly disagree

## Continuing Medical Education

Exams are available online only at [cme.psychiatryonline.org](http://cme.psychiatryonline.org)

### INFORMATION TO PARTICIPANTS

**OBJECTIVES.** After evaluating a specific journal article published in the American Journal of Psychiatry, participants should be able to demonstrate an increase in their knowledge of clinical medicine. Participants should be able to understand the contents of a selected research or review article and to apply the new findings to their clinical practice.

**PARTICIPANTS.** This program is designed for all psychiatrists in clinical practice, residents in Graduate Medical Education programs, medical students interested in psychiatry, and other physicians who wish to advance their current knowledge of clinical medicine.

**EXPLANATION OF HOW PHYSICIANS CAN PARTICIPATE AND EARN CREDIT.** In order to earn CME credit, subscribers should read through

the material presented in the article. After reading the article, complete the CME quiz online at [cme.psychiatryonline.org](http://cme.psychiatryonline.org) and submit your evaluation and study hours (up to 1 *AMA PRA Category 1 Credit™*).

**CREDITS.** The APA designates this educational activity for a maximum of 1 *AMA PRA Category 1 Credit™*. Physicians should only claim credit commensurate with the extent of their participation in the activity. The American Psychiatric Association (APA) is accredited by the Accreditation Council for Continuing Medical Education (ACCME) to provide continuing medical education (CME) for physicians.

**Estimated Time to Complete: 1 Hour**

Begin date September 1, 2008 – End date August 31, 2010

### EXAMINATION QUESTIONS

Select the single best answer for each question below.

#### Mentalization: Ontogeny, Assessment, and Application in the Treatment of Borderline Personality Disorder

Lois W. Choi-Kain and John G. Gunderson  
Am J Psychiatry 2008; 165:1127-1135

**QUESTION 1.** Fonagy's concept of mentalization, defined as an ability to imagine the mental states of oneself and others, includes the following dimensions:

- A. Self and other-oriented dimensions.
- B. Implicit and explicit dimensions.
- C. Cognitive and affective dimensions.
- D. All of the above.

**QUESTION 2.** Concepts overlapping with mentalization include all of the following EXCEPT:

- A. Psychological mindedness
- B. Transference
- C. Empathy
- D. Mindfulness

**QUESTION 3.** Which of the following terms describes a prementalistic or nonmentalizing mode of functioning observable in individuals with borderline personality disorder?

- A. Potential space
- B. Alpha-function
- C. Psychic equivalence
- D. Reflective functioning

### EVALUATION QUESTIONS

This evaluation form is adapted from the *MedBiquitous Journal-Based Continuing Education Guidelines 28 November 2005*. This evaluation will appear online at the end of each CME course. Participants must complete this evaluation in order to receive credit. Select the response which best indicates your reaction to the following statements about this activity.

**STATEMENT 1.** The activity achieved its stated objectives.

- 1. Strongly agree
- 2. Agree
- 3. Neutral
- 4. Disagree
- 5. Strongly disagree

**STATEMENT 2.** The activity was relevant to my practice.

- 1. Strongly agree
- 2. Agree
- 3. Neutral
- 4. Disagree
- 5. Strongly disagree

**STATEMENT 3.** I plan to change my current practice based on what I learned in the activity.

- 1. Strongly agree
- 2. Agree
- 3. Neutral
- 4. Disagree
- 5. Strongly disagree

**STATEMENT 4.** The activity validated my current practice.

- 1. Strongly agree
- 2. Agree
- 3. Neutral
- 4. Disagree
- 5. Strongly disagree

**STATEMENT 5.** The activity provided sufficient scientific evidence to support the content presented.

- 1. Strongly agree
- 2. Agree
- 3. Neutral
- 4. Disagree
- 5. Strongly disagree

**STATEMENT 6.** The activity was free of commercial bias toward a particular product or company.

- 1. Strongly agree
- 2. Agree
- 3. Neutral
- 4. Disagree
- 5. Strongly disagree

Exams are available online only at [cme.psychiatryonline.org](http://cme.psychiatryonline.org)

## INFORMATION TO PARTICIPANTS

**OBJECTIVES.** After evaluating a specific journal article published in the American Journal of Psychiatry, participants should be able to demonstrate an increase in their knowledge of clinical medicine. Participants should be able to understand the contents of a selected research or review article and to apply the new findings to their clinical practice.

**PARTICIPANTS.** This program is designed for all psychiatrists in clinical practice, residents in Graduate Medical Education programs, medical students interested in psychiatry, and other physicians who wish to advance their current knowledge of clinical medicine.

**EXPLANATION OF HOW PHYSICIANS CAN PARTICIPATE AND EARN CREDIT.** In order to earn CME credit, subscribers should read through

the material presented in the article. After reading the article, complete the CME quiz online at [cme.psychiatryonline.org](http://cme.psychiatryonline.org) and submit your evaluation and study hours (up to 1 *AMA PRA Category 1 Credit™*).

**CREDITS.** The APA designates this educational activity for a maximum of 1 *AMA PRA Category 1 Credit™*. Physicians should only claim credit commensurate with the extent of their participation in the activity. The American Psychiatric Association (APA) is accredited by the Accreditation Council for Continuing Medical Education (ACCME) to provide continuing medical education (CME) for physicians.

**Estimated Time to Complete: 1 Hour**

Begin date September 1, 2008 – End date August 31, 2010

## EXAMINATION QUESTIONS

Select the single best answer for each question below.

### An Adoption Study of Parental Depression as an Environmental Liability for Adolescent Depression and Childhood Disruptive Disorders

Erin C. Tully et al.

Am J Psychiatry 2008; 165:1148-1154

**QUESTION 1.** This unique parent-child adoption study allowed the investigators to isolate mechanisms of risk for adolescent psychopathology. Which of the following reflects their observations regarding the association between maternal depression and risk for adolescent psychopathology?

- A. There was no liability for adolescent depression related to the presence of maternal depression.
- B. This association was present in families even when the mother and child had a nonbiological relationship
- C. There was an association only between paternal depression and adolescent psychopathology.
- D. The study demonstrated that the liability incurred by maternal depression is solely genetic.

**QUESTION 2.** Which of the following reflects the rates of parental major depression observed in this study?

- A. Rates of depression in adoptive parents were lower due to the screening process in selecting them.
- B. Rates of depression were twice as high in non-adoptive compared to adoptive parents
- C. Either parent was depressed in 34% of non-adoptive and 38% of adoptive families
- D. Depression in either parent was 20% higher in adoptive parents than non-adoptive parents

**QUESTION 3.** Which of the following statements describe the implications of this research for treatment of psychopathology in families with depressed mothers?

- A. Biological and non-biological adolescents of depressed mothers should be targeted for preventative interventions.
- B. Treatment that reduces depression in mothers may reduce risk for psychopathology in their children.
- C. Although non-biological children of depressed mothers do not have elevated genetic risk from the adoptive mother, clinical attention is warranted due to their elevated environmental risk.
- D. All of the above.

## EVALUATION QUESTIONS

This evaluation form is adapted from the MedBiquitous Journal-Based Continuing Education Guidelines 28 November 2005.

This evaluation will appear online at the end of each CME course. Participants must complete this evaluation in order to receive credit. Select the response which best indicates your reaction to the following statements about this activity.

**STATEMENT 1.** The activity achieved its stated objectives.

- 1. Strongly agree
- 2. Agree
- 3. Neutral
- 4. Disagree
- 5. Strongly disagree

**STATEMENT 2.** The activity was relevant to my practice.

- 1. Strongly agree
- 2. Agree
- 3. Neutral
- 4. Disagree
- 5. Strongly disagree

**STATEMENT 3.** I plan to change my current practice based on what I learned in the activity.

- 1. Strongly agree
- 2. Agree
- 3. Neutral
- 4. Disagree
- 5. Strongly disagree

**STATEMENT 4.** The activity validated my current practice.

- 1. Strongly agree
- 2. Agree
- 3. Neutral
- 4. Disagree
- 5. Strongly disagree

**STATEMENT 5.** The activity provided sufficient scientific evidence to support the content presented.

- 1. Strongly agree
- 2. Agree
- 3. Neutral
- 4. Disagree
- 5. Strongly disagree

**STATEMENT 6.** The activity was free of commercial bias toward a particular product or company.

- 1. Strongly agree
- 2. Agree
- 3. Neutral
- 4. Disagree
- 5. Strongly disagree
