# Read *The American Journal of Psychiatry* Online

Activate your FREE online access—It's as easy as 1, 2, 3!

To begin activation, go to [ajp.psychiatryonline.org](http://ajp.psychiatryonline.org) and click **SUBSCRIBE**

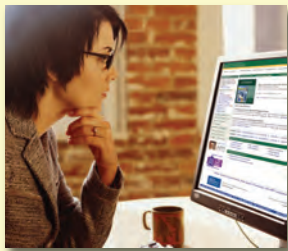

For APA Members and Other Individuals:

1. Click on **ACTIVATE Your Member or Individual (Non-Member) Subscription**
2. Locate your 10-digit Member/Customer Number\* on your journal mailing label above your name. Be sure to enter all 10 digits, including any leading zeros.
3. Enter your number in the box and click **SUBMIT**.

On the next screen, you'll register your subscription and create a username and password that can be used immediately to access your online subscription.

\*If you are an APA Member, in most cases the number on your label will be your Member Number; if it is not, please enter your APA Member Number (with enough leading zeros to create 10 digits) instead of the number on your mailing label.

For Institutions:

1. Click on **ACTIVATE Your Institutional Subscription**.
2. Locate your Customer Number on the journal mailing label above your name. Be sure to enter all 10-digits.
3. Enter your number in the box and click **SUBMIT**. On the next screen, you'll have the opportunity to enter IP addresses for your institution to provide seamless access for your patrons.

Member/Customer Number

AJP3000056866 CAR-RT LOT88 C-015  
John Q. Sample  
Mental Health Professional  
1000 Wilson Blvd STE 1825  
Arlington VA 22209-3924 01654

## Benefits of Online Activation

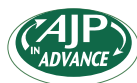

**AJP in Advance**—key research articles posted on the AJP website well in advance of their appearance in print.

**Back issue access to Volume 1, Issue 1**, starting with the *American Journal of Insanity* in 1844. (Available to institutions as a separate one-time purchase.)

**AJP CME**—interactive quizzes that offer *AMA PRA Category 1 Credits™* for selected articles from each issue (with paid subscription to the CME Course Program).

**AJP Audio**—MP3-format program summarizing findings from key articles from each issue.

**Residents' Journal**—the gateway to AJP articles and features that have most value to residents in their training.

**Precise and powerful searching** by author, keyword, and/or citation details—within any one journal, across the entire PsychiatryOnline journal collection, or across all HighWire journals.

**PubMed, CrossRef, and Google Scholar links**—from cited references to abstracts and full text; to similar articles; to other articles by the same lead authors.

**eTOCs**—Get advance email alerts with the table of contents from the latest issue.

For more information or if you cannot locate your customer number, please contact APPI Customer Service:  
Call: 1.800.368.5777 or 703.907.7322  
Email: [appi@psych.org](mailto:appi@psych.org)

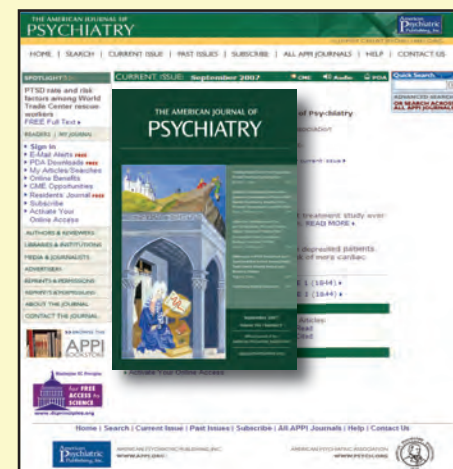

American  
**Psychiatric**  
Publishing, Inc.

The First and Last Word in Psychiatry

AH810

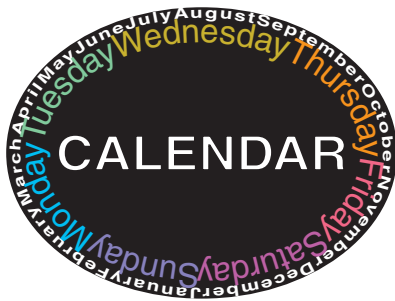

For free listing of your organization's official annual or regional meeting, please send us the following information: sponsor, location, inclusive dates, type and number of continuing education credits (if available), and the name, address, and telephone number of the person or group to contact for more information. In order for an event to appear in our listing, all notices and changes must be received at least 6 months in advance of the meeting and should be addressed to:

*Calendar, American Journal of Psychiatry, 1000 Wilson Boulevard, Suite 1825, Arlington, VA 22209-3901, jblair@psych.org (e-mail).*

*Because of space limitations, only listings of meetings of the greatest interest to Journal readers will be included.*

## SEPTEMBER

**September 4–7**, Canadian Psychiatric Association 58th Annual Meeting, Vancouver, British Columbia, Canada. Contact: 260-441 MacLaren Street, Ottawa, ON K2P 2H3, Canada; (800) 267-1555 (tel), (613) 234-9857 (fax), cpa@medcal.org (e-mail).

**September 20–25**, XIV World Congress of Psychiatry, Prague. Contact: Dr. Jiri Raboch, jiri.raboch@lf1cuni.cz (e-mail), www.wpanet.org (web site).

**September 25–26**, Critical Issues in the Care of Older Adults: Managing Depression & Substance Use in Later Life, Ann Arbor, MI. Contact: Registrar, Office of Continuing Medical Education, University of Michigan Medical School, G1200 Towsley Center, 1500 E. Medical Center Drive, SPC 5201, Ann Arbor, MI 48109-5201, (734) 763-1400 (tel), (734) 936-1641 (fax), OCME@umich.edu (e-mail), http://cme.med.umich.edu (web site).

## OCTOBER

**October 2–5**, 60th Institute on Psychiatric Services, American Psychiatric Association, Chicago, IL. Contact: Jill Gruber, APA Annual Meetings Dept., 1000 Wilson Blvd., Ste. 1825, Arlington, VA 22209; (703) 907-7815.

**October 17–19**, 3rd International Conference on Schizophrenia (IconS III), Chennai, India. Contact: Schizophrenia Research Foundation (SCARF), scarf@vsnl.com (e-mail), www.icons-scarf.org (web site).

**October 28–November 2**, 55th Annual Meeting of the American Academy of Child and Adolescent Psychiatry, Chicago. Contact: AACAP, 3615 Wisconsin Avenue, N.W., Washington, DC 20016-3007; (202) 966-7300 (tel), (202) 966-2891 (fax), meetings@

aacap.org (e-mail), www.aacap.org (web site).

## NOVEMBER

**November 14–17**, Annual Conference of the International Society for the Study of Trauma and Dissociation, Chicago. Contact: Heidi Walker, Executive Director; hwalker@amg-inc.com (e-mail), isst-d.org (web site).

## FEBRUARY 2009

**February 18–22**, Annual Meeting of the American Neuropsychiatric Association (ANPA), San Antonio, TX. Contact: ANPA office; (614) 447-2077 (tel), (614) 263-4366 (fax), anpa@osu.edu (e-mail), www.anpaonline.org (web site).

**February 25–March 1**, American College of Psychiatrists Annual Meeting, Tucson, AZ. Contact: 122 South Michigan Avenue, Suite 1360, Chicago, IL 60603; (312) 662-1020 (tel), (312) 662-1025 (fax), angel@ACPsych.org (e-mail).

## MARCH

**March 5–8**, 22nd Annual Meeting of the American Association for Geriatric Psychiatry, Honolulu. Contact: AAGP, 7910 Woodmont Ave., Ste. 1050, Bethesda, MD 20814-3004; (301) 654-7850 (tel), (301) 654-4137 (fax), www.aagpmeeting.org (web site).

**March 27–29**, 3rd International Conference of The International Society of Interpersonal Psychotherapy (ISIPT), New York City, NY. Contact: 2009 ISIPT Planning Committee; hv2009@columbia.edu (e-mail).

## APRIL

**April 22–26**, Annual Meeting and Scientific Sessions of the Society of Be-

havioral Medicine, Montreal, Quebec. Contact: Society of Behavioral Medicine, (414) 918-3156 (tel), (414) 276-3349 (fax), info@sbm.org (e-mail).

## MAY

**May 16–21**, 162nd Annual Meeting of the American Psychiatric Association, San Francisco, CA. Contact: Cathy Nash, APA Annual Meetings Dept., 1000 Wilson Blvd., Ste. 1825, Arlington, VA 22209; (703) 907-7822.

## JUNE

**June 16–20**, 2nd Thematic Conference on Legal and Forensic Psychiatry, Madrid, Spain. Contact: World Psychiatric Association, Alfredo Calcedo Barba, forensicpsychiatry2009@gmail.com.

## AUGUST

**August 27–30**, Canadian Psychiatric Association 59th Annual Meeting, St. Johns, Newfoundland, Canada. Contact: 260-441 MacLaren Street, Ottawa, ON K2P 2H3, Canada; (800) 267-1555 (tel), (613) 234-9857 (fax), conferene@cpa-apc.org (e-mail), www.cpa-apc.org (web site).

## OCTOBER

**October 8–11**, 61st Institute on Psychiatric Services, American Psychiatric Association, New York, NY. Contact: Jill Gruber, APA Annual Meetings Dept., 1000 Wilson Blvd., Ste. 1825, Arlington, VA 22209; (703) 907-7815.

**October 27–November 1**, 56th Annual Meeting of the American Academy of Child and Adolescent Psychiatry, Honolulu, HI. Contact: AACAP, 3615 Wisconsin Avenue, N.W., Washington, DC

*Continued on page A37*

# New Feature for Residents!

## The American Journal of Psychiatry Residents' Journal

A FREE electronic publication produced specifically for psychiatry residents

The Residents' Journal contains special links to full text of the articles from the current *American Journal of Psychiatry* and to AJP Audio, a downloadable MP3 file featuring highlights from the issue. In addition, this e-mail bulletin contains two exclusive features:

### Journal Club Kit

A featured article presented with an overview discussing the reasons for its selection, discussion questions, and an editorial by a senior member of the field placing the article into clinical context.

### Educational Article

Case presentation that illustrates a major point in clinical practice or highlights unique treatment approaches.

Plus lively contributions from your fellow residents:

- Instructive cases
- Unique clinical or educational programs
- Perspectives on training and career development
- Discussions arising from journal club discussions

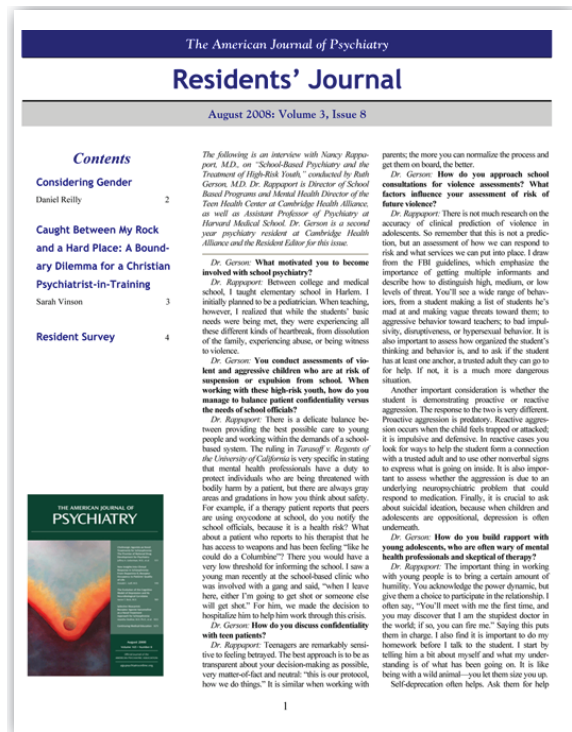

The Resident's Journal is sent free-of-charge to all psychiatry residents. Anyone interested in being included on the distribution list should contact Lisa Devine, the Residents' Journal staff editor at [ajp@psych.org](mailto:ajp@psych.org) with "Subscribe to Residents' Journal" in the subject line.

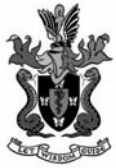

# THE BRITISH JOURNAL OF PSYCHIATRY

August 2008, VOL. 193

|     |                                                                                                                                                                                                                                                                                                |     |
|-----|------------------------------------------------------------------------------------------------------------------------------------------------------------------------------------------------------------------------------------------------------------------------------------------------|-----|
| A4  | <b>Editorial Board</b>                                                                                                                                                                                                                                                                         |     |
| A6  | <b>Highlights of this issue</b>                                                                                                                                                                                                                                                                |     |
|     | <b>Editorials</b>                                                                                                                                                                                                                                                                              |     |
| 91  | <b>Non-financial conflicts of interests in psychiatric research and practice</b><br>M. Maj                                                                                                                                                                                                     | 130 |
| 93  | <b>Lithium and eGFR: a new routinely available tool for the prevention of chronic kidney disease</b><br>R. Morriss and B. Benjamin                                                                                                                                                             | 134 |
| 95  | <b>Diego Velazquez (1599–1660) Portrait of Juan Calabazas (Calabacillas) - psychiatry in pictures</b>                                                                                                                                                                                          | 140 |
|     | <b>In debate</b>                                                                                                                                                                                                                                                                               |     |
| 96  | <b>Community treatment orders are not a good thing</b><br>S. Lawton-Smith / J. Dawson and T. Burns                                                                                                                                                                                             | 145 |
|     | <b>Review article</b>                                                                                                                                                                                                                                                                          |     |
| 101 | <b>Non-pharmacological management of antipsychotic-induced weight gain: systematic review and meta-analysis of randomised controlled trials</b><br>M. Álvarez-Jiménez, S.E. Hetrick, C. González-Blanch, J.F. Gleeson, and P.D. McGorry                                                        | 151 |
|     | <b>Papers</b>                                                                                                                                                                                                                                                                                  |     |
| 108 | <b>Effect of anxiety and depression on blood pressure: 11-year longitudinal population study</b><br>B. Hildrum, A. Mykletun, J. Holmen, and A.A. Dahl                                                                                                                                          | 152 |
| 113 | <b>Alcoholism in ancient Israel—psychiatry in the Old Testament</b><br>George Stein                                                                                                                                                                                                            | 156 |
| 114 | <b>Vocational intervention in first-episode psychosis: individual placement and support v. treatment as usual</b><br>E. Killackey, H.J. Jackson, and P.D. McGorry                                                                                                                              |     |
| 121 | <b>DRD2 and ANKK1 genotype in alcohol-dependent patients with psychopathic traits: association and interaction study</b><br>G. Ponce, J. Hoenicka, M.A. Jiménez-Arriero, R. Rodríguez-Jiménez, M. Aragües, N. Martín-Suñé, E. Huertas, and T. Palomo                                           |     |
| 125 | <b>Mentalisation: a key skill for psychiatrists and their patients - in 100 words</b><br>Jeremy Holmes                                                                                                                                                                                         |     |
| 126 | <b>Abnormal anterior cingulum integrity in bipolar disorder determined through diffusion tensor imaging</b><br>F. Wang, M. Jackowski, J.H. Kalmar, L.G. Chepenik, K. Tie, M. Qiu, G. Gong, B.P. Pittman, M.M. Jones, M.P. Shah, L. Spencer, X. Papademetris, R.T. Constable, and H.P. Blumberg |     |
|     | <b>Homicide due to mental disorder in England and Wales over 50 years</b><br>M. Large, G. Smith, N. Swinson, J. Shaw, and O. Nielssen                                                                                                                                                          |     |
|     | <b>Predicting suicide attempts in young adults with histories of childhood abuse</b><br>J. Brezo, J. Paris, F. Vitaro, M. Hébert, R.E. Tremblay, and G. Turecki                                                                                                                                |     |
|     | <b>Parents' perspectives on adolescent self-harm: qualitative study</b><br>A. Oldershaw, C. Richards, M. Simic, and U. Schmidt                                                                                                                                                                 |     |
|     | <b>Psychopathological factors, memory disorders and transient global amnesia</b><br>A. Noël, P. Quinette, B. Guillery-Girard, J. Dayan, P. Piolino, S. Marquis, V. de la Sayette, F. Viader, B. Desgranges, and F. Eustache                                                                    |     |
|     | <b>Brief reflection on laughter—poems by doctors</b><br>Miroslav Holub                                                                                                                                                                                                                         |     |
|     | <b>Quick recovery of orientation after magnetic seizure therapy for major depressive disorder</b><br>G. Kirov, K.P. Ebmeier, A.I.F. Scott, M. Atkins, N. Khalid, L. Carrick, A. Stanfield, R.E. O'Carroll, M.M. Husain, and S.H. Lisanby                                                       |     |
|     | <b>Questionnaires for 360-degree assessment of consultant psychiatrists: development and psychometric properties</b><br>P. Lelliott, R. Williams, A. Mears, M. Andiappan, H. Owen, P. Reading, N. Coyle, and S. Hunter                                                                         |     |
|     | <b>Short reports</b>                                                                                                                                                                                                                                                                           |     |
| 161 | <b>Ethnicity and quality of antipsychotic prescribing among in-patients in south London</b><br>A. Connolly and D. Taylor                                                                                                                                                                       |     |
| 163 | <b>Maintenance pharmacotherapy for recurrent major depressive disorder: 5-year follow-up study</b><br>I.A.K. Holma, K.M. Holma, T.K. Melartin, and E.T. Isometsä                                                                                                                               |     |
| 165 | <b>Differences in psychological effects in hospital doctors with and without post-traumatic stress disorder</b><br>S. Einav, A.Y. Shalev, H. Ofek, S. Freeman, I. Matot, and C.F. Weiniger                                                                                                     |     |
|     | <b>Columns</b>                                                                                                                                                                                                                                                                                 |     |
| 167 | <b>Correspondence</b>                                                                                                                                                                                                                                                                          |     |
| 169 | <b>Corrections</b>                                                                                                                                                                                                                                                                             |     |
| 170 | <b>Book reviews</b>                                                                                                                                                                                                                                                                            |     |
| 176 | <b>Contents of Advances in Psychiatric Treatment</b>                                                                                                                                                                                                                                           |     |
| 177 | <b>Contents of the American Journal of Psychiatry</b>                                                                                                                                                                                                                                          |     |
| 178 | <b>From the Editor's desk</b>                                                                                                                                                                                                                                                                  |     |
